# Supplementary material for: Multiple HPV Infections and Viral Load Association in Persistent Cervical Lesions in Mexican Women
Source: PubMed Central journal article supplement (PMC7232502; doi:10.3390/v12040380), 2020-03-31
Supplement: viruses-12-00380-s001.pdf [file viruses-12-00380-s001.pdf]

Table S1. Sociodemographic parameters.

| <b>Patients sociodemographic characteristics</b> |                         |                         |
|--------------------------------------------------|-------------------------|-------------------------|
| <b>n = 294</b>                                   | <b>HPV+<br/>n = 178</b> | <b>HPV-<br/>n = 116</b> |
| Age                                              | 35 ( $\pm$ 12)          | 37 ( $\pm$ 12)          |
| Place of birth<br>(Northeast region)             | 93%                     | 89%                     |
| Profession<br>(Housewife)                        | 47%                     | 60%                     |
| Marital status<br>(Married)                      | 43%                     | 44%                     |
| Scholarship                                      | 46%                     | 36%                     |
| Family history<br>of cancer                      | 43%                     | 36%                     |
| Comorbidity                                      | 14%                     | 16%                     |
| Alcohol<br>consumption                           | 30%                     | 27%                     |
| Smoking<br>history                               | 34%                     | 27%                     |
| BMI<br>(normal 19%-25%)                          | 39%                     | 25%                     |

Table S2. Gynecological and obstetric characteristics.

| <b>Gynecological and obstetric background</b> |                 |                 |
|-----------------------------------------------|-----------------|-----------------|
|                                               | <b>HPV+</b>     | <b>HPV-</b>     |
| Menarche age                                  | 13 ( $\pm$ 1.6) | 13 ( $\pm$ 1.6) |
| Active sex life initiation<br>(<18 years old) | 64%             | 56%             |
| <i>p</i> = 0.019                              |                 |                 |
| Sexual partners<br>(>1)                       | 77%             | 62%             |
| Barrier contraceptive<br>methods              | 33%             | 20%             |
| STD                                           | 54%             | 33%             |
| HPV vaccinated                                | 3%              | 1%              |
| First Pap smear after first sexual contact    | 6 years         | 6 years         |

**Table S3.** HR-HPV-types in cases with multiple infections at the first consultation.

| <b>Cases</b> | <b>HR-HPV Multiple Infections</b> | <b>Cases</b> | <b>HR-HPV Multiple Infections</b> |
|--------------|-----------------------------------|--------------|-----------------------------------|
| 1            | 16, 18                            | 1            | 18, 45                            |
| 1            | 16, 18, 33                        | 1            | 18, 51                            |
| 2            | 16, 18, 39, 52, 51                | 2            | 18, 51, 52                        |
| 2            | 16, 18, 51                        | 3            | 18, 52                            |
| 1            | 16, 18, 51, 52                    | 2            | 18, 58                            |
| 2            | 16, 18, 59                        | 1            | 31, 52, 59                        |
| 1            | 16, 18, 59, 51                    | 1            | 31, 35, 39, 52                    |
| 1            | 16, 18, 59, 66                    | 1            | 31, 39, 45, 59                    |
| 1            | 16, 18, 59, 68                    | 1            | 31, 39, 52, 56, 59                |
| 2            | 16, 18, 68                        | 2            | 31, 52, 56                        |
| 1            | 16, 18, 68, 56, 58                | 1            | 31, 58                            |
| 4            | 16, 31                            | 1            | 31, 56, 59                        |
| 1            | 16, 31, 18                        | 1            | 35, 39, 51, 52, 56, 68,           |
| 1            | 16, 31, 18, 35                    | 1            | 35, 39, 58                        |
| 1            | 16, 31, 18, 59                    | 1            | 39, 56, 59, 51, 52                |
| 1            | 16, 31, 18, 66                    | 1            | 39, 51                            |
| 1            | 16, 31, 39, 52                    | 1            | 39, 51, 52, 66                    |
| 1            | 16, 31, 39, 59, 68, 56, 52        | 2            | 39, 51, 59                        |
| 1            | 16, 31, 45                        | 1            | 39, 52, 56, 68                    |
| 1            | 16, 31, 59, 52                    | 2            | 39, 56                            |
| 1            | 16, 35                            | 1            | 39, 58                            |
| 5            | 16, 39                            | 1            | 39, 59                            |
| 1            | 16, 39, 45, 59                    | 1            | 39, 59, 56, 51                    |
| 1            | 16, 45                            | 2            | 35, 52                            |
| 4            | 16, 51                            | 1            | 45, 58                            |
| 2            | 16, 56                            | 2            | 51, 59                            |
| 6            | 16, 58                            | 1            | 52, 56                            |
| 1            | 16, 58, 51                        | 1            | 52, 56, 68                        |
| 1            | 18, 31, 52                        | 2            | 52, 58                            |
| 1            | 18, 35, 66                        | 1            | 52, 59                            |
| 1            | 18, 39                            | 1            | 56, 58                            |
| 1            | 18, 31, 39, 33, 56                | 1            | 56, 59                            |
| 1            | 18, 39, 33, 52                    | 1            | 56, 68                            |
| 1            | 18, 39, 45, 52, 58, 56            | 1            | 58, 68                            |
| 1            | 18, 39, 51                        | 1            | 59, 68                            |
| 1            | 18, 39, 52, 51                    | 1            | 33, 45, 68                        |
| 1            | 18, 39, 59, 51                    | 1            | 33, 58, 68                        |
| 1            | 18, 39, 59, 56                    | 1            | 35, 66                            |

**Table S4.** Comparison of the HR-HPV types found in the persistent HPV-infected samples in the follow-up study.

| Sample # | HPV type in first consultation | HPV type in second consultation | Persistent HPV | New HPV type acquired | HPV type eliminated    |
|----------|--------------------------------|---------------------------------|----------------|-----------------------|------------------------|
| 1        | 16                             | 16, 31, 18, 59                  | 16             | 31, 18, 59            | -                      |
| 2        | 59, 56                         | 39, 59, 56                      | 59, 56         | 39                    | -                      |
| 3        | 31, 39, 35, 52                 | 31, 39, 59, 52                  | 31, 39, 52     | 0                     | 35                     |
| 4        | 16, 45, 35                     | 16, 66                          | 16             | 66                    | 35, 45                 |
| 5        | 18                             | 31                              | 0              | 31                    | 18                     |
| 6        | 31, 18, 52                     | 39, 59, 56, 52                  | 52             | 39, 59, 56            | 31, 18                 |
| 7        | 59                             | 59                              | 59             | -                     | -                      |
| 8        | 68, 56, 52                     | 39, 56                          | 56             | 39                    | 68, 52                 |
| 9        | 66                             | 59                              | -              | 59                    | 66                     |
| 10       | 39, 35, 68, 56, 52, 51         | 59, 68                          | 68             | 59                    | 39, 35, 56, 52, 51     |
| 11       | 18                             | 18                              | 18             | -                     | -                      |
| 12       | 45                             | 56                              | -              | 56                    | 45                     |
| 13       | 16                             | 16, 59                          | 16             | 59                    | -                      |
| 14       | 16, 18, 59                     | 59                              | 59             | -                     | 16, 18                 |
| 15       | 31, 56, 52                     | 39, 31, 52, 56                  | 52, 56, 31     | 39                    | -                      |
| 16       | 52                             | 39, 59, 52, 56                  | 52             | 39, 59, 56            | -                      |
| 17       | 45                             | 51                              | -              | 51                    | 45                     |
| 18       | 16                             | 58                              | -              | 58                    | 16                     |
| 19       | 56                             | 39, 56                          | 56             | 39                    | -                      |
| 20       | 16, 18, 68                     | 16, 58                          | 16             | 58                    | 68                     |
| 21       | 39, 59, 51                     | 16, 58                          | -              | 16, 58                | 39, 59, 51             |
| 22       | 39, 58, 52, 45, 18, 56         | 39, 56                          | 39, 56         | -                     | 58, 52, 45, 18         |
| 23       | 33, 68, 58                     | 68, 58                          | 68, 58         | -                     | 33                     |
| 24       | 18, 39                         | 51                              | -              | 51                    | 18, 39                 |
| 25       | 18, 39, 33, 52                 | 33, 52                          | 33, 52         | -                     | 18, 39                 |
| 26       | 52                             | 52                              | 52             | -                     | -                      |
| 27       | 16                             | 16, 31                          | 16             | 31                    | -                      |
| 28       | 56                             | 59                              | -              | 59                    | 56                     |
| 29       | 51                             | 56                              | -              | 56                    | 51                     |
| 30       | 16, 31, 39, 59, 68, 56, 52     | 31                              | 31             | -                     | 16, 39, 59, 68, 56, 52 |
| 31       | 16, 31, 59, 52                 | 16, 31, 59, 68, 58, 52          | 16, 31, 59, 52 | 68, 58                | -                      |
